# Supplementary material for: New insights into hydrothermal vent processes in the unique shallow-submarine arc-volcano, Kolumbo (Santorini), Greece
Source: PubMed Central journal article supplement — Sci Rep. 2013 Aug 13;3:2421. doi: 10.1038/srep02421 (PMC3741630; doi:10.1038/srep02421), 2013-08-13
Supplement: srep02421-s1.pdf [file srep02421-s1.pdf]

# **Title: New insights into hydrothermal vent processes in the unique shallow-submarine arc-volcano, Kolumbo (Santorini), Greece**

**Authors:** Stephanos P. Kiliyas<sup>1</sup>, Paraskevi Nomikou<sup>1</sup>, Dimitrios Papanikolaou<sup>1</sup>, Paraskevi N. Polymenakou<sup>2</sup>, Athanasios Godelitsas<sup>1</sup>, Ariadne Argyraki<sup>1</sup>, Steven Carey<sup>3</sup>, Platon Gamaletsos<sup>1,6</sup>, Theo J. Mertzimekis<sup>4</sup>, Eleni Stathopoulou<sup>5</sup>, Joerg Goettlicher<sup>6</sup>, Ralph Steininger<sup>6</sup>, Konstantina Betzelou<sup>1</sup>, Isidoros Livanos<sup>1</sup>, Christos Christakis<sup>1,2</sup>, Katherine Croff Bell<sup>3</sup>, Michael Scoullou<sup>5</sup>

## **Affiliations:**

<sup>1</sup>National and Kapodistrian University of Athens, Faculty of Geology and Geoenvironment, Panepistimiopoli Zografou, 15784 Athens, Greece.

<sup>2</sup>Hellenic Centre for Marine Research, Institute of Marine Biology, Biotechnology and Aquaculture, Gournes PEDIADOS, P.O.Box 2214, Gr 71003, Heraklion Crete, Greece.

<sup>3</sup>Graduate School of Oceanography, University of Rhode Island, Narragansett, USA.

<sup>4</sup>National and Kapodistrian University of Athens, Faculty of Physics, Panepistimiopoli Zografou, 15784 Athens, Greece.

<sup>5</sup>National and Kapodistrian University of Athens, Faculty of Chemistry, Panepistimiopoli Zografou, 15784 Athens, Greece.

<sup>6</sup>Karlsruhe Institute of Technology, ANKA Synchrotron Radiation Facility, Hermann-von-Helmholtz-Platz 1, 76344 Eggenstein-Leopoldshafen, Germany

**\*Correspondence:** Correspondence and requests for materials should be addressed to S.P.K.. (email: kiliyas@geol.uoa.gr).

## **This supplement contains:**

- 1. Supplementary Figures (7)**
- 2. Supplementary Tables (4)**
- 3. Supplementary References**

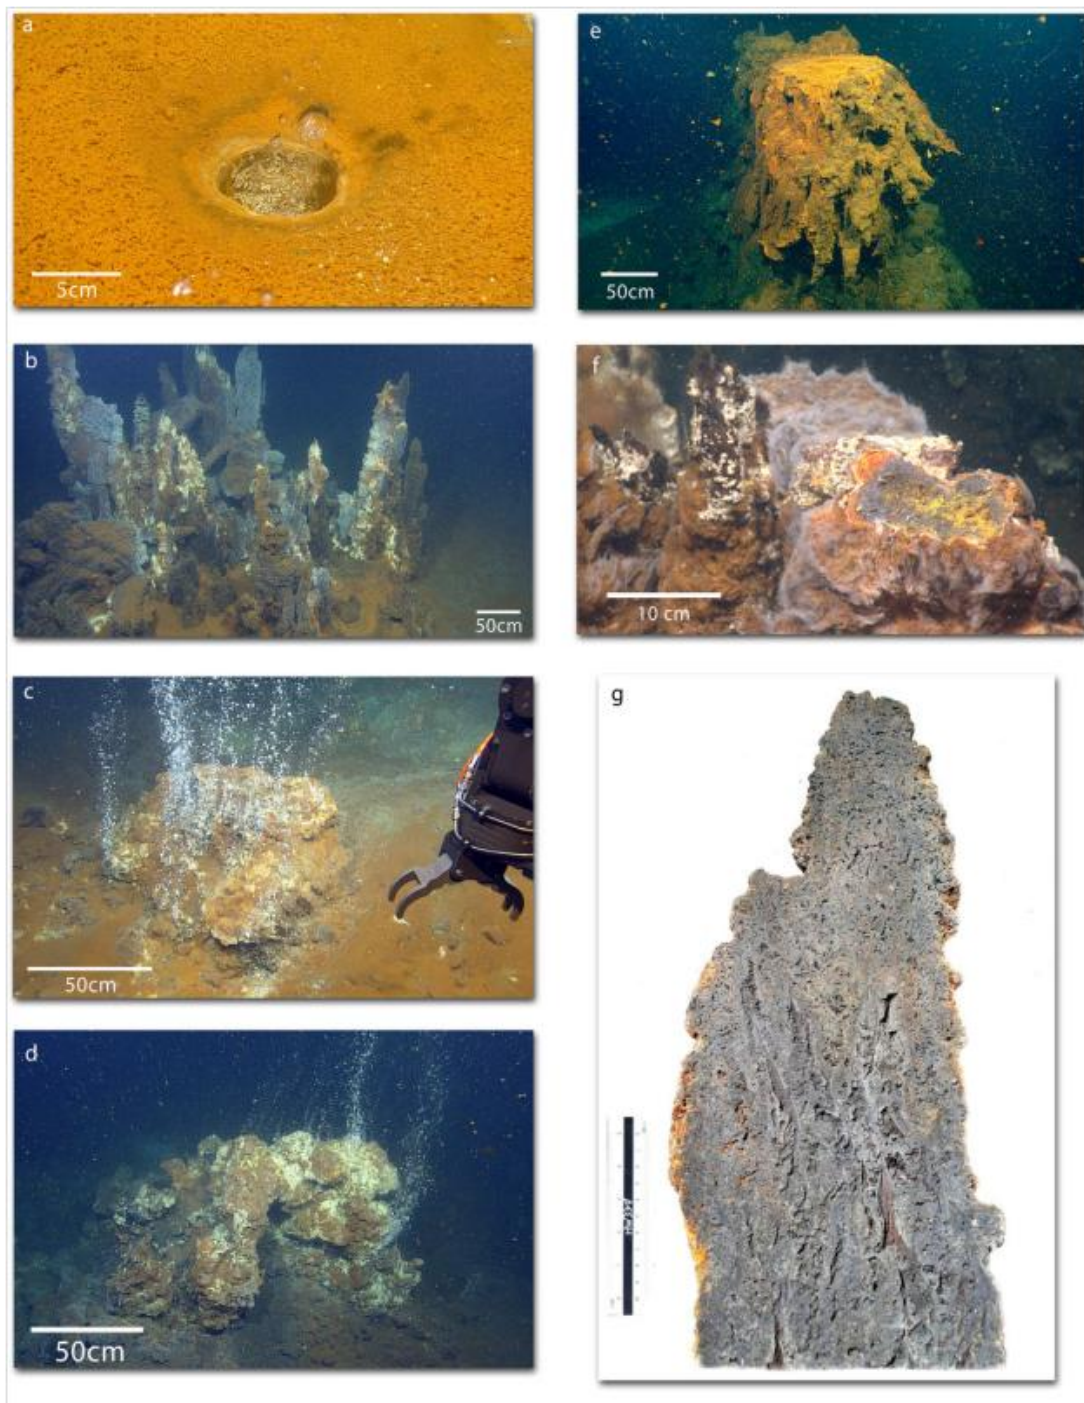

**Supplementary Figure 1| Bottom photographs from ROV Hercules submersible and single intact recovered chimney** (Submarine photographs taken by co-Chief Scientists Steven Carey, Katherine Croff Bell, Paraskevi Nomikou onboard E/V Nautilus during oceanographic cruises NA007-NA014). **a**, Small pockmark-like crater discharging low-temperature ( $70^{\circ}\text{C}$ ) fluids. **b**, Politeia Vent Complex (“Politeia”): Field of multiple inactive and active sulphide/sulphate , spires

up to 2 m high on top of a hydrothermal mound with spire fragments draped by Fe-bearing bacterial mats. Clear fluids vent from active spires (not visible). **c**, The base of the knocked over vent spire sample NA014-003, revealing textural zones (see Figure 5a). The exterior of the spire is covered by grayish active suspended filamentous microbial biofilms (streamers). Note the “flame-like” jets of hydrothermal steam on far back spire (left corner). **d**, Champagne Vent Complex (“Champagne”): Active high-temperature (220°C) vent discharging both gases (>99 % CO<sub>2</sub>) and fluids. **e**, Diffuser II Vent Complex (“Diffuser II”): Vent with bacterial covering and gas bubbling. **f**, Poet’s Candle: The largest observed (height ~ 4 m) inactive vent with bacterial covering. **g**, Section of the NA014-003 single intact spire. Bar is 10 cm long.

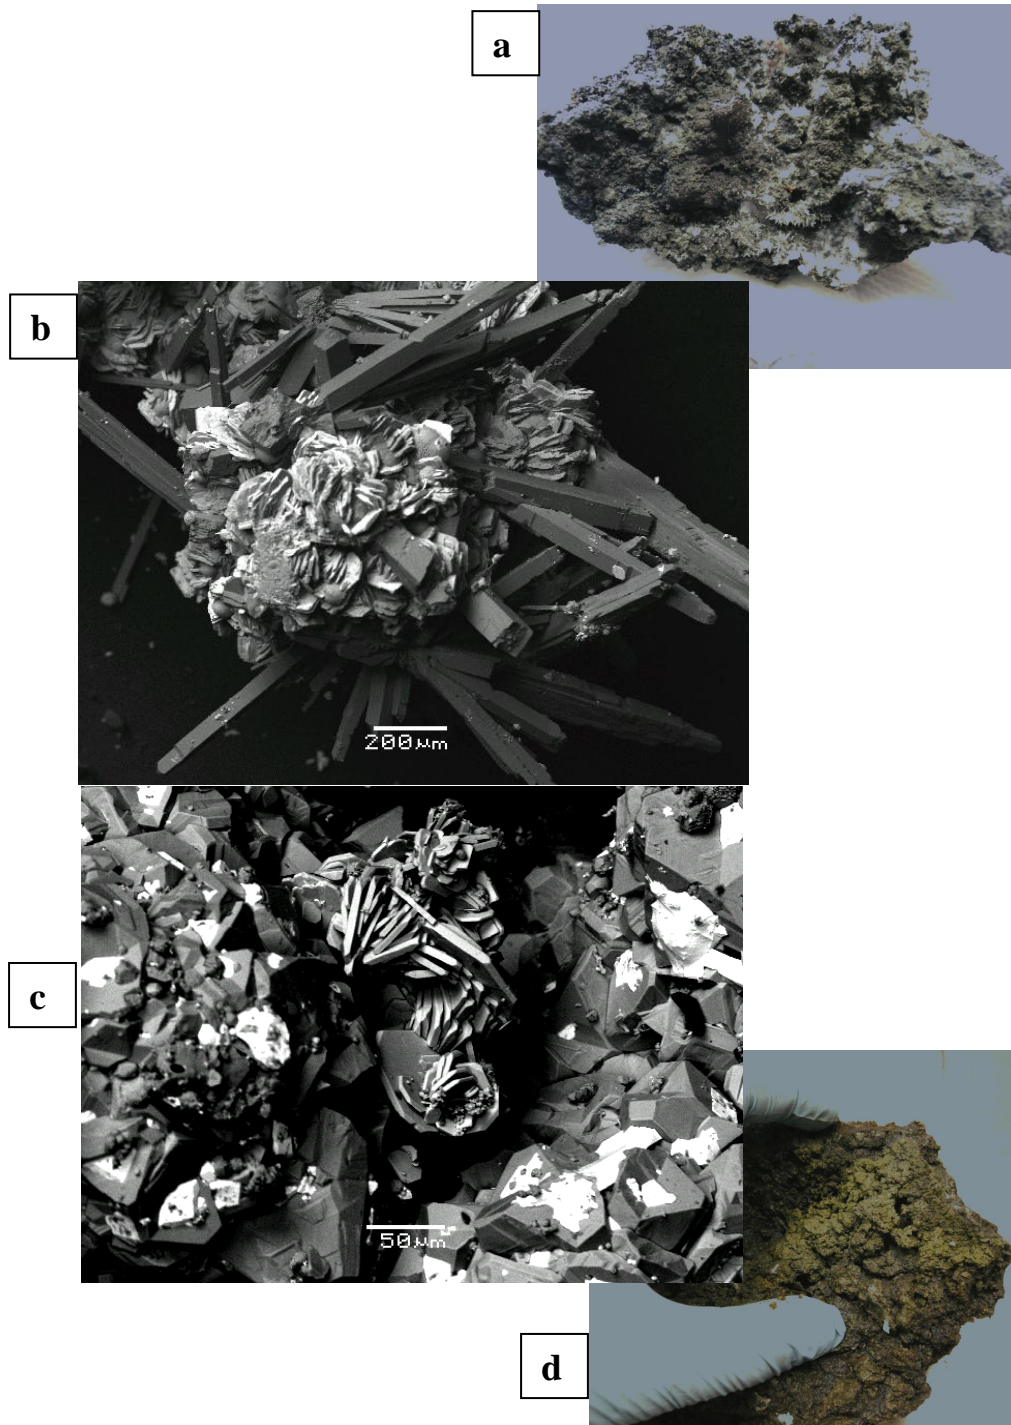

**Supplementary Figure 2/ Macroscopic and SEM images of sulfide-sulfate minerals from Champagne . a, hand specimen with gypsum acicular crystals grown onto sulphide-sulphate matrix, b, SEM image of external surface of the sample showing botryoidal aggregates of pyrite and/or marcasite, associated with euhedral crystals of gypsum and barite, c, local aggregates of twinned chalcopyrite crystals with barite aggregates and galena precipitates, d, mount piece with brassy chalcopyrite**

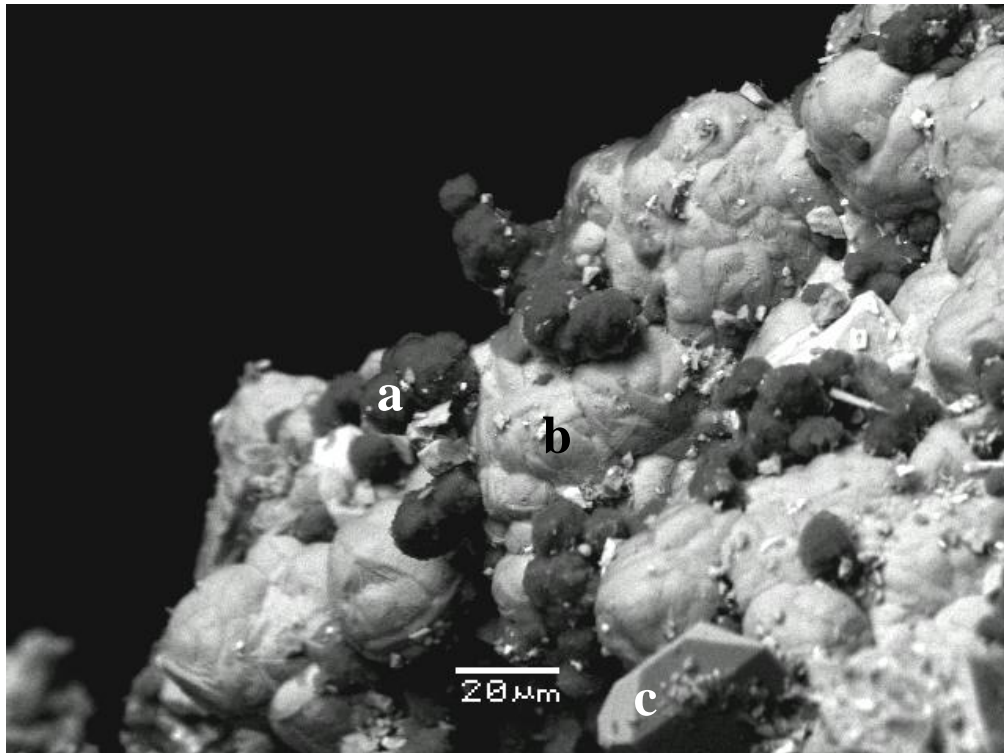

**Supplementary Figure 3 | SEM image of phases lining open conduits of *Politeia spire*. a, K-Mg-Al-silicates (dark grey features, b, overgrown amorphous Sb-Zn sulfide aggregates, c, barite crystal.**

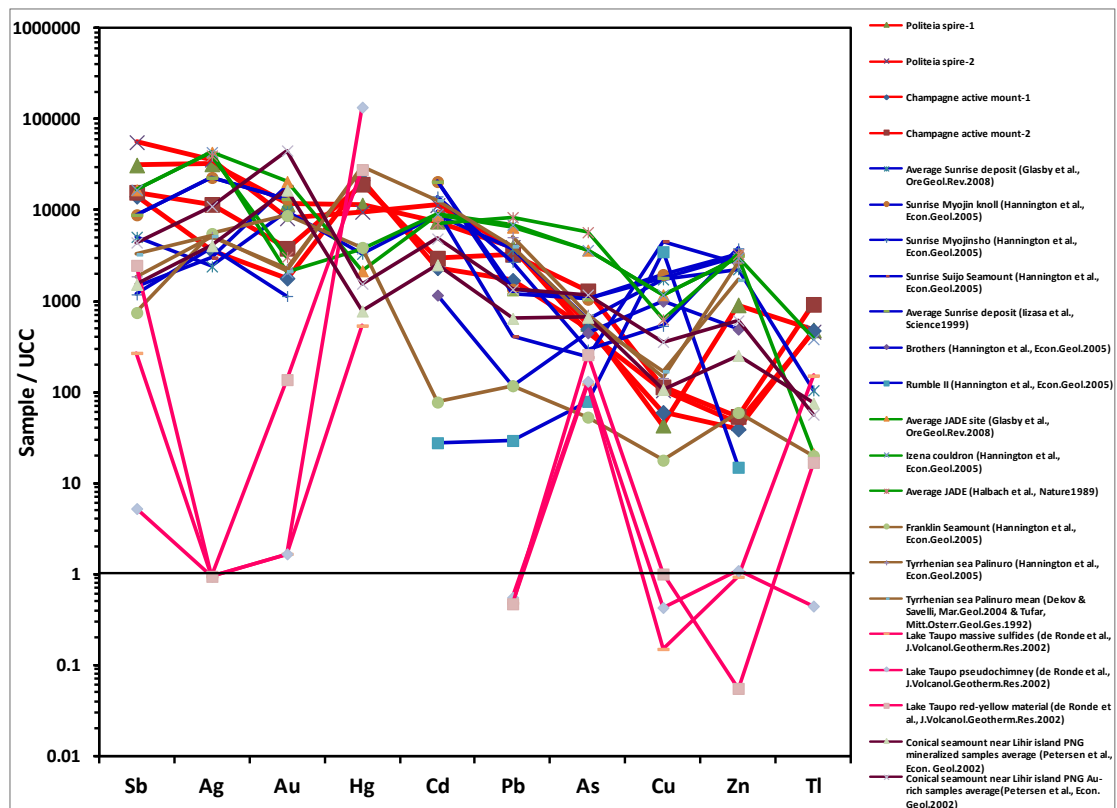

**Supplementary Figure 4/** Geochemical spidergram comparing the Kolumbo vent samples with other seafloor hydrothermal deposits from various tectonic settings. Concentrations are normalized to Upper Continental Crust (UCC)<sup>1</sup> for selected noble (Ag, Au), potentially life-essential (Cu, Zn) and potentially toxic (Sb, Hg, Cd, As, Tl) elements. The average and maximum concentrations of Tl (510 ppm and >,1000 ppm respectively) and Sb (8,333 ppm and 2.2 wt %, respectively) are among the highest reported from modern seafloor hydrothermal systems. Average Sunrise deposit<sup>2</sup>, Sunrise Myojin knoll<sup>17</sup>, Sunrise Myojinsho<sup>17</sup>, Sunrise Sujo Seamount<sup>17</sup>, Brothers<sup>17</sup>, Rumble II<sup>17</sup>, Average JADE site<sup>3</sup>, Izena cauldron<sup>17</sup>, Average JADE<sup>4</sup>, Franklin Seamount<sup>17</sup>, Tyrrhenian sea Palinuro<sup>17</sup>, Tyrrhenian sea Palinuro mean<sup>5,6</sup>, Lake Taupo massive sulfides<sup>7</sup>, Lake Taupo pseudochimney<sup>7</sup>, Lake Taupo red-yellow material<sup>7</sup>, Conical seamount-mineralized samples average<sup>34</sup>, Conical seamount- gold-rich samples average<sup>34</sup>.<sup>17</sup> or <sup>34</sup>; see ref. 17, or 34, in the main article

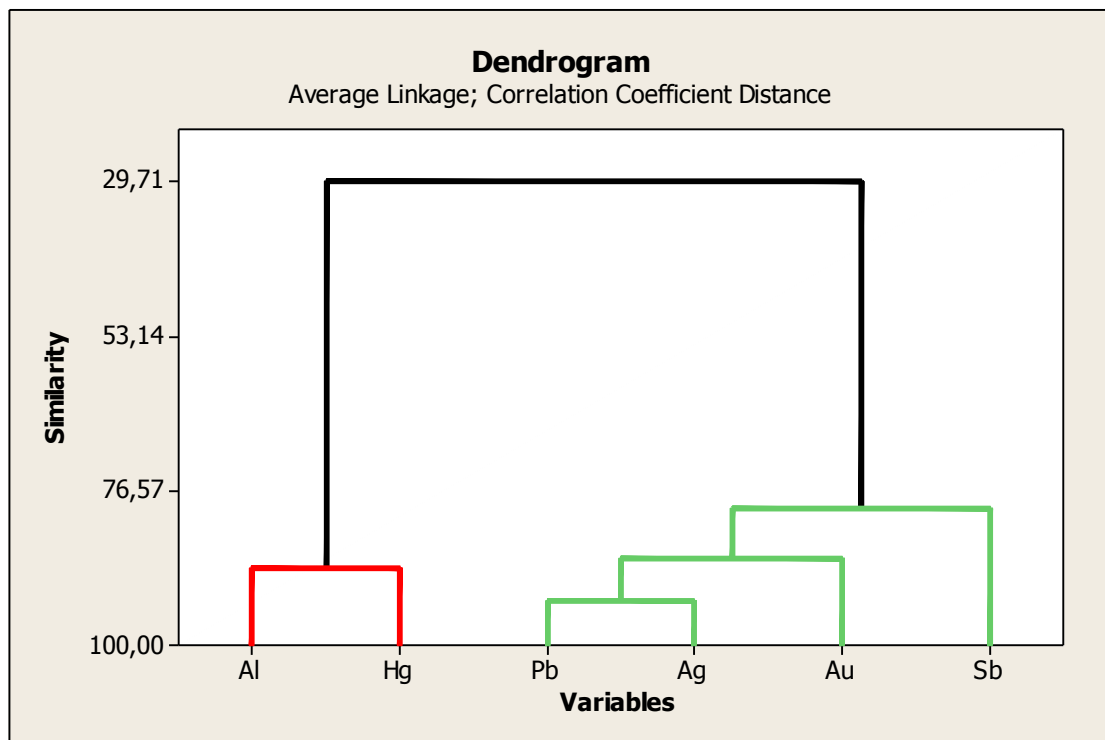

**Supplementary Figure 5| Dendrogram based on statistical correlation of elements in Kolumbo samples.** Variables are clustered into 2 groups according to similarity level. The first group includes Hg and Al with similarity level 88% and the second group includes Au, Pb, Ag and Sb with similarity level >79%. The relationships suggest that Au and Ag may be associated with sulfide mineral phases while Hg may be associated with aluminosilicate phases.

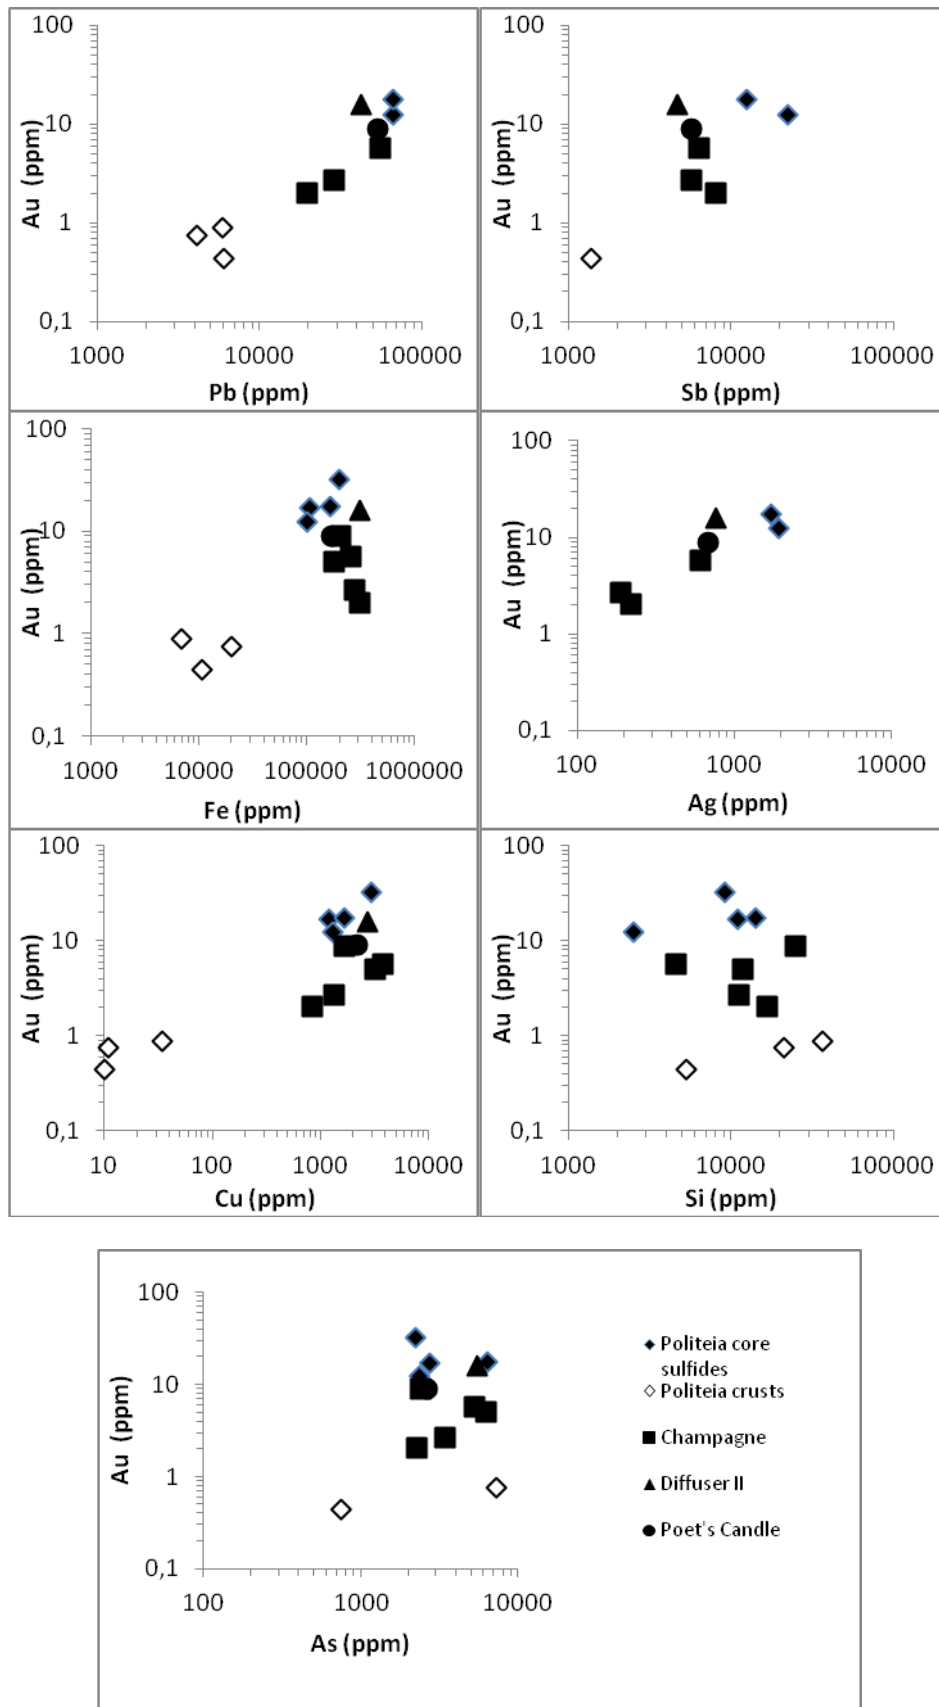

**Supplementary Figure 6| Log/log plots of selected elements versus Au.** Clustering of samples is observed according to vent complex, signifying different physicochemical conditions of formation. Relative enrichment of Politeia sulfides in Au, Ag, Sb and Pb is also observed.



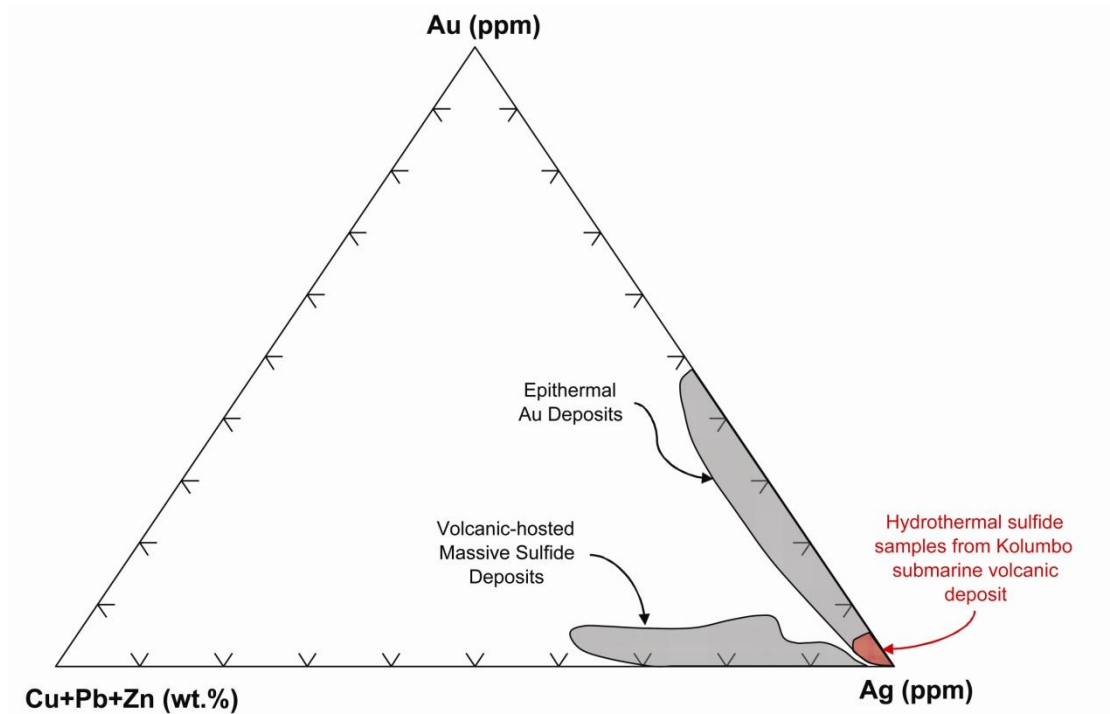

**Supplementary Figure 7 | Comparison of average Au, Ag and base-metal (Cu+Pb +Zn) content of samples from Kolumbo hydrothermal field and other sea-floor sulfides deposits.** Compositional fields of typical epithermal gold deposits and volcanogenic massive sulfides are also shown (see Ref. 35).

**Supplementary Table S1**

Average content in ppm ( $\text{mg kg}^{-1}$ ) of selected elements in samples from Kolumbo compared with other modern seafloor volcanogenic massive sulfide-style and epithermal-style hydrothermal deposits. Ref. XX: see reference XX in the main article.

|                                                                      | <i>n</i> | Si     | Al   | Fe     | Pb     | Sr    | As    | Sb   | Bi   | Zn     | Cu     | Cd   | Hg   | Tl  | Ag   | Au     | Refs       |
|----------------------------------------------------------------------|----------|--------|------|--------|--------|-------|-------|------|------|--------|--------|------|------|-----|------|--------|------------|
| <b>Average Kolumbo deposit</b>                                       | 14       | 14100  | 5890 | 166000 | 35000  | 10400 | 3810  | 8330 | 0.05 | 10200  | 1640   | 276  | 397  | 389 | 871  | 9      | This study |
| <b>Mid-ocean ridges:</b>                                             |          |        |      |        |        |       |       |      |      |        |        |      |      |     |      |        |            |
| <b>S. Explorer Ridge</b>                                             | 51       | 44409  |      | 252000 | 1000   |       | 575   | 42   | 2.0  | 54000  | 32000  | 200  | 11   | 43  | 125  | 0.72   | Ref. 17    |
| <b>Endeavour Segment Main Field</b>                                  | 83       | 42539  |      | 301000 | 5000   |       | 356   | 42   | 0.2  | 64000  | 27000  | 250  | 8    | 28  | 267  | 0.11   | Ref. 17    |
| <b>Cleft segment, South cleft<br/>East Pacific Rise<br/>11N, EPR</b> | 16       | 16361  |      | 186000 | 1000   |       | 360   | 18   | 0.1  | 309000 | 11000  | 615  | 2    | 23  | 230  | 0.11   | Ref. 17    |
| <b>Galapagos rift</b>                                                | 18       | 12621  |      | 205000 | 1000   |       | 330   | 26   | 0.3  | 266000 | 16000  | 885  | 2    | 19  | 37   | 0.15   | Ref. 17    |
| <b>Mid-Atlantic Ridge TAG, surface and core</b>                      | 128      | 118267 |      | 283000 | 500    |       | 120   | 10   | 1.1  | 35000  | 45000  | 140  | 4    | 12  | 37   | 0.29   | Ref. 17    |
| <b>Volcanic arcs:</b>                                                | 310      | 50953  |      | 272000 | 500    |       | 55    | 28   | 9.0  | 65000  | 49000  | 232  | 9    | 13  | 92   | 1.8    | Ref. 17    |
| <b>Average Sunrise deposit</b>                                       | 12       | 89753  | 3705 | 116808 | 63700  | 1704  | 3050  | 2037 | 10.2 | 150800 | 48700  | 808  | 166  | 94  | 128  | 14.6   | 2          |
| <b>Sunrise Myojin knoll</b>                                          | 37       | 40669  |      | 105000 | 23000  |       | 5045  | 3565 |      | 219000 | 55000  | 1860 |      |     | 1215 | 20     | Ref. 17    |
| <b>Average Sunrise deposit</b>                                       | 37       | 40576  |      | 100480 | 20270  |       | 5044  | 3564 |      | 210890 | 50540  | 1858 |      |     | 1213 | 20     | 2          |
| <b>Suiyo seamount</b>                                                | 13       |        |      | 150000 | 0.7    |       | 1168  | 585  |      |        | 128000 |      |      |     | 162  | 27.7   | Ref. 39    |
| <b>Brothers</b>                                                      | 9        |        |      | 74000  | 2000   |       | 2155  |      |      | 33000  | 28000  | 105  |      |     |      |        | Ref. 17    |
| <b>Rumble II</b>                                                     | 1        |        |      | 125000 | 500    |       | 380   |      |      | 1000   | 98000  | 2.5  |      |     |      |        | Ref. 17    |
| <b>Conical seamount</b>                                              | 40       |        |      | 83000  | 10000  |       | 3200  | 612  |      | 17000  | 3000   |      | 39   |     | 216  | 25     | Ref. 34    |
| <b>Lake Taupo massive sulphides</b>                                  | 1        |        |      | 253000 | 8.2    |       | 588   | 108  |      | 62.5   | 4.2    |      | 27   | 137 | <0.1 | <0.005 | 7          |
| <b>Back arc rifts:</b>                                               |          |        |      |        |        |       |       |      |      |        |        |      |      |     |      |        |            |
| <b>Average JADE site</b>                                             |          | 19634  | 3175 | 62251  | 110800 | 1592  | 17500 | 6710 | 35.6 | 200200 | 33000  | 794  | 108  | 19  | 2300 | 31     | 3          |
| <b>Izena couldron</b>                                                | 40       | 47214  |      | 62000  | 118000 |       | 17500 | 6710 | 25.0 | 202000 | 33000  | 820  | 190  | 345 | 2305 | 3      | Ref. 17    |
| <b>Back arc basins:</b>                                              |          |        |      |        |        |       |       |      |      |        |        |      |      |     |      |        |            |
| <b>Tyrrhenian Sea Panarea</b>                                        | 5        | 118735 |      | 105000 | 28000  |       | 505   |      |      | 62000  | 500    | 255  |      |     | 11   |        | Ref. 17    |
| <b>Tyrrhenian Sea Palinuro</b>                                       | 15       |        |      | 151000 | 86000  |       | 3400  | 750  |      | 179000 | 4000   |      | 1400 |     | 270  | 3.4    | Ref. 17    |
| <b>Manus Basin (intraoceanic)</b>                                    | 26       |        |      | 149000 | 1.7    |       | 11000 | 1130 |      | 269000 | 109000 |      | 17   |     | 230  | 15     | Ref. 17    |

**Supplementary Table S2**

Average content in ppm ( $\text{mg kg}^{-1}$ ) or otherwise mentioned units of selected elements in hydrothermal vent samples from the Kolumbo deposit

| Sample                                    | Sr           | V         | Cr         | Ni        | Cd          | %<br>TOC    | %<br>TOT/S |
|-------------------------------------------|--------------|-----------|------------|-----------|-------------|-------------|------------|
| NA014-003 Politeia spire-1 (ISSC)         | 10900        | 12        | 55         | <20       | 682         |             | 24         |
| NA014-003 Politeia spire-1 (OAsL)         | 21700        | 12        |            | 55        | 26          |             |            |
| NA014-003 Politeia spire-1 (SFeC)         | 35200        | 30        | 123        | <20       | 7           |             | 13         |
| NA014-003 Politeia spire-1 composite      | 1030         | <10       | 4          | 7         | 629         | 5.82        |            |
| NA014-005 Diffuser II                     | 1610         | <10       | 6          | 2         | 50          | 5.71        |            |
| NA014-007 Champagne active mount (base)   | 1180         | 10        | 5          | 4         | 44          | 5.77        |            |
| NA014-016 Poet's Candle sulfide           | 1160         | <10       | 4          | 15        | 210         | 3.86        |            |
| NA014-027 Champagne active mount-1 (N=2)  | 11400        | <8        | 5          | 38        | 126         | 5.91        | 30         |
| NA014-028 Champagne active mount -2 (N=2) | 11900        | <8        | 6          | 5         | 226         | 5.86        | 30         |
| NA014-039 Politeia spire-2 (ISSC)         | 4570         | 15        | 27         | <20       | 1025        |             | 34         |
| NA014-039 Politeia spire-2 (SFeC)         | 41300        | 43        | 21         | <20       | 4           |             | 12         |
| NA014-039 Politeia spire-2 composite      | 1010         | <10       | 4          | 7         | 489         | 4.14        |            |
| <b>AVERAGE</b>                            | <b>10400</b> | <b>20</b> | <b>24</b>  | <b>20</b> | <b>276</b>  | <b>5.30</b> | <b>24</b>  |
| <b>MAX</b>                                | <b>41300</b> | <b>43</b> | <b>123</b> | <b>55</b> | <b>1025</b> | <b>5.91</b> | <b>34</b>  |
| <b>N</b>                                  | <b>14</b>    | <b>6</b>  | <b>11</b>  | <b>10</b> | <b>14</b>   | <b>7</b>    | <b>6</b>   |

### Supplementary Table S3

Microbial taxonomy of the produced sequences for the four samples by using the RDP classifier of the Ribosomal Database Project. The most abundant observed species (OTUs) were further compared to GenBank entries using BLAST (Basic Local Alignment Search Tool, National Center for Biotechnology Information, Bethesda, MD, USA) in order to confirm their phylogenetic affiliation. The most abundant OTU closely affiliated to *Nitrosopumilus maritimus* SCM1 (99% sequence similarity) is presented in grey background.

| NA014_003  | NA014_007 | NA014_016  | NA014_042  | Consensus Lineage                                                              |
|------------|-----------|------------|------------|--------------------------------------------------------------------------------|
| 39         | 27        | 27         | 90         | Archaea unclassified                                                           |
| <b>615</b> | <b>91</b> | <b>347</b> | <b>198</b> | <b><i>Thaumarchaeota;Nitrosopumilales;Nitrosopumilaceae;Nitrosopumilus</i></b> |
| 0          | 0         | 23         | 81         | Crenarchaeota;Thermoprotei                                                     |
| 0          | 0         | 0          | 3          | Crenarchaeota;Thermoprotei;Thermoproteales;Thermofilaceae;Thermofilum          |
| 9          | 3         | 5          | 23         | Euryarchaeota                                                                  |
| 0          | 0         | 0          | 1          | Euryarchaeota;Methanomicrobia                                                  |
| 2          | 0         | 4          | 5          | Euryarchaeota;Thermoplasmata;Thermoplasmatales                                 |
| 1096       | 1573      | 550        | 1333       | Bacteria;unclassified                                                          |
| 0          | 1         | 16         | 21         | Acidobacteria                                                                  |
| 1          | 3         | 10         | 2          | Acidobacteria;Acidobacteria_Gp10;Gp10                                          |
| 0          | 0         | 0          | 1          | Acidobacteria;Acidobacteria_Gp2;Gp2                                            |
| 0          | 3         | 18         | 13         | Acidobacteria;Acidobacteria_Gp21;Gp21                                          |
| 2          | 5         | 11         | 7          | Acidobacteria;Acidobacteria_Gp22;Gp22                                          |
| 1          | 10        | 0          | 0          | Acidobacteria;Acidobacteria_Gp23;Gp23                                          |
| 0          | 1         | 1          | 2          | Acidobacteria;Acidobacteria_Gp26;Gp26                                          |
| 0          | 1         | 13         | 12         | Acidobacteria;Acidobacteria_Gp6;Gp6                                            |
| 0          | 0         | 1          | 4          | Acidobacteria;Acidobacteria_Gp9;Gp9                                            |
| 0          | 0         | 0          | 1          | Acidobacteria;Holophagae                                                       |
| 1          | 0         | 3          | 14         | Actinobacteria                                                                 |
| 0          | 0         | 1          | 0          | Actinobacteria;Acidimicrobiales                                                |
| 0          | 0         | 0          | 1          | Actinobacteria;Acidimicrobiales;Iamiaceae;Iamia                                |
| 0          | 0         | 1          | 0          | Actinobacteria;Actinomycetales;Brevibacteriaceae;Brevibacterium                |
| 0          | 1         | 5          | 1          | Actinobacteria;Actinomycetales;Corynebacteriaceae;Corynebacterium              |
| 0          | 2         | 0          | 0          | Actinobacteria;Actinomycetales;Geodermatophilaceae                             |
| 0          | 1         | 1          | 0          | Actinobacteria;Actinomycetales;Micrococcaceae;Micrococcus                      |
| 0          | 0         | 1          | 0          | Actinobacteria;Actinomycetales;Nocardioideae;Nocardioideae                     |
| 0          | 4         | 8          | 6          | Actinobacteria;Actinomycetales;Propionibacteriaceae;Propionibacterium          |
| 174        | 72        | 20         | 9          | Bacteroidetes                                                                  |
| 1          | 10        | 1          | 0          | Bacteroidetes;Bacteroidetes_incertae_sedis;Fulvivirga                          |
| 0          | 0         | 1          | 0          | Bacteroidetes;Bacteroidia;Bacteroidales;Prevotellaceae;Prevotella              |
| 7          | 3         | 0          | 0          | Bacteroidetes;Flavobacteria;Flavobacteriales                                   |
| 1          | 1         | 5          | 0          | Bacteroidetes;Flavobacteria;Flavobacteriales;Cryomorphaceae                    |
| 78         | 8         | 166        | 1          | Bacteroidetes;Flavobacteria;Flavobacteriales;Flavobacteriaceae                 |
| 1          | 0         | 0          | 0          | Bacteroidetes;Flavobacteria;Flavobacteriales;Flavobacteriaceae;Elizabethkingia |
| 0          | 2         | 3          | 0          | Bacteroidetes;Flavobacteria;Flavobacteriales;Flavobacteriaceae;Gaetbulibacter  |
| 0          | 0         | 1          | 0          | Bacteroidetes;Flavobacteria;Flavobacteriales;Flavobacteriaceae;Lacinutrix      |
| 1          | 0         | 10         | 0          | Bacteroidetes;Flavobacteria;Flavobacteriales;Flavobacteriaceae;Lutimonas       |
| 1          | 3         | 1          | 0          | Bacteroidetes;Flavobacteria;Flavobacteriales;Flavobacteriaceae;Muricauda       |
| 13         | 16        | 9          | 2          | Bacteroidetes;Sphingobacteria;Sphingobacteriales                               |
| 0          | 0         | 0          | 1          | Bacteroidetes;Sphingobacteria;Sphingobacteriales;Chitinophagaceae              |
| 4          | 9         | 5          | 0          | Bacteroidetes;Sphingobacteria;Sphingobacteriales;Rhodothermaceae               |
| 1          | 1         | 0          | 0          | Bacteroidetes;Sphingobacteria;Sphingobacteriales;Rhodothermaceae;Rhodothermus  |
| 4          | 1         | 5          | 0          | Bacteroidetes;Sphingobacteria;Sphingobacteriales;Saprospiraceae                |
| 0          | 0         | 1          | 1          | BRC1;BRC1_genera_incertae_sedis                                                |
| 1          | 0         | 0          | 0          | Caldiserica;Caldisericia;Caldisericales;Caldiseriaceae;Caldisericum            |

|     |     |     |     |                                                                                    |
|-----|-----|-----|-----|------------------------------------------------------------------------------------|
| 6   | 1   | 3   | 17  | Chlamydiae;Chlamydiae;Chlamydiales                                                 |
| 0   | 0   | 0   | 3   | Chlamydiae;Chlamydiae;Chlamydiales;Parachlamydiaceae                               |
| 0   | 8   | 0   | 1   | Chlamydiae;Chlamydiae;Chlamydiales;Parachlamydiaceae;Parachlamydia                 |
| 0   | 11  | 0   | 0   | Chlamydiae;Chlamydiae;Chlamydiales;Simkaniaceae;Simkania                           |
| 0   | 1   | 1   | 1   | Chlamydiae;Chlamydiae;Chlamydiales;Waddliaceae;Waddlia                             |
| 0   | 2   | 0   | 12  | Chloroflexi                                                                        |
| 0   | 26  | 0   | 6   | Chloroflexi;Anaerolineae;Anaerolineales;Anaerolineaceae                            |
| 0   | 0   | 0   | 1   | Chloroflexi;Caldilineae;Caldilineales;Caldilineaceae;Caldilinea                    |
| 0   | 0   | 0   | 12  | Chloroflexi;Dehalococcoidetes                                                      |
| 0   | 0   | 0   | 6   | Chloroflexi;Dehalococcoidetes;Dehalogenimonas                                      |
| 0   | 0   | 0   | 1   | Cyanobacteria;Cyanobacteria;Family II;GpIIa                                        |
| 0   | 1   | 2   | 1   | Deinococcus-Thermus;Deinococci;Deinococcales;Trueperaceae;Truepera                 |
| 1   | 0   | 0   | 0   | Deinococcus-Thermus;Deinococci;Thermales;Thermaceae;Oceanithermus                  |
| 0   | 0   | 0   | 4   | Firmicutes                                                                         |
| 0   | 0   | 0   | 1   | Firmicutes;Bacilli;Bacillales;Bacillaceae;Bacillus                                 |
| 0   | 0   | 1   | 0   | Firmicutes;Bacilli;Bacillales;Staphylococcaceae;Gemella                            |
| 0   | 0   | 1   | 0   | Firmicutes;Bacilli;Bacillales;Staphylococcaceae;Staphylococcus                     |
| 0   | 0   | 1   | 0   | Firmicutes;Bacilli;Lactobacillales                                                 |
| 1   | 2   | 1   | 1   | Firmicutes;Bacilli;Lactobacillales;Lactobacillaceae;Lactobacillus                  |
| 0   | 1   | 9   | 3   | Firmicutes;Bacilli;Lactobacillales;Streptococcaceae;Streptococcus                  |
| 0   | 0   | 2   | 0   | Firmicutes;Clostridia;Clostridiales;Incertae Sedis XI;Finegoldia                   |
| 0   | 1   | 0   | 0   | Firmicutes;Clostridia;Clostridiales;Peptococcaceae                                 |
| 0   | 0   | 1   | 0   | Firmicutes;Clostridia;Clostridiales;Ruminococcaceae;Faecalibacterium               |
| 0   | 0   | 1   | 1   | Firmicutes;Clostridia;Clostridiales;Veillonellaceae                                |
| 1   | 1   | 0   | 0   | Firmicutes;Clostridia;Clostridiales;Veillonellaceae;Veillonella                    |
| 0   | 0   | 1   | 0   | Lentisphaerae;Lentisphaeria;Lentisphaerales;Lentisphaeraceae;Lentisphaera          |
| 66  | 0   | 0   | 0   | Nitrospira;Nitrospira;Nitrospirales;Nitrospiraceae                                 |
| 0   | 5   | 8   | 0   | Nitrospira;Nitrospira;Nitrospirales;Nitrospiraceae;Nitrospira                      |
| 68  | 15  | 0   | 0   | OD1;OD1_genera_incertae_sedis                                                      |
| 155 | 281 | 79  | 106 | Planctomycetes;Planctomycetacia;Planctomycetales;Planctomycetaceae                 |
| 3   | 31  | 9   | 5   | Planctomycetes;Planctomycetacia;Planctomycetales;Planctomycetaceae;Blastopirellula |
| 0   | 0   | 1   | 0   | Planctomycetes;Planctomycetacia;Planctomycetales;Planctomycetaceae;Pirellula       |
| 25  | 17  | 5   | 0   | Planctomycetes;Planctomycetacia;Planctomycetales;Planctomycetaceae;Planctomyces    |
| 2   | 1   | 2   | 1   | Planctomycetes;Planctomycetacia;Planctomycetales;Planctomycetaceae;Rhodopirellula  |
| 206 | 58  | 85  | 33  | Proteobacteria                                                                     |
| 197 | 101 | 138 | 16  | Alphaproteobacteria                                                                |
| 34  | 19  | 33  | 0   | Alphaproteobacteria;Caulobacterales;Hyphomonadaceae                                |
| 1   | 0   | 0   | 0   | Alphaproteobacteria;Caulobacterales;Hyphomonadaceae;Maricaulis                     |
| 5   | 2   | 6   | 0   | Alphaproteobacteria;Parvularculales;Parvularculaceae;Parvularcula                  |
| 3   | 0   | 17  | 1   | Alphaproteobacteria;Rhizobiales                                                    |
| 0   | 0   | 0   | 4   | Alphaproteobacteria;Rhizobiales;Bradyrhizobiaceae                                  |
| 0   | 0   | 1   | 0   | Alphaproteobacteria;Rhizobiales;Bradyrhizobiaceae;Afipia                           |
| 0   | 0   | 1   | 1   | Alphaproteobacteria;Rhizobiales;Hyphomicrobiaceae                                  |
| 1   | 0   | 2   | 0   | Alphaproteobacteria;Rhizobiales;Hyphomicrobiaceae;Filomicrobium                    |
| 1   | 0   | 2   | 0   | Alphaproteobacteria;Rhizobiales;Phyllobacteriaceae                                 |
| 0   | 0   | 0   | 2   | Alphaproteobacteria;Rhizobiales;Rhizobiaceae;Rhizobium                             |
| 42  | 13  | 33  | 1   | Alphaproteobacteria;Rhodobacterales;Rhodobacteraceae                               |
| 1   | 6   | 0   | 0   | Alphaproteobacteria;Rhodobacterales;Rhodobacteraceae;Lutimaribacter                |
| 0   | 0   | 0   | 1   | Alphaproteobacteria;Rhodobacterales;Rhodobacteraceae;Paracoccus                    |
| 0   | 0   | 5   | 0   | Alphaproteobacteria;Rhodobacterales;Rhodobacteraceae;Roseovarius                   |
| 0   | 41  | 0   | 1   | Alphaproteobacteria;Rhodospirillales                                               |
| 12  | 20  | 62  | 9   | Alphaproteobacteria;Rhodospirillales;Rhodospirillaceae                             |
| 0   | 0   | 2   | 0   | Alphaproteobacteria;Rhodospirillales;Rhodospirillaceae;Thalassobaculum             |
| 2   | 0   | 0   | 0   | Alphaproteobacteria;Rickettsiales;SAR11;Pelagibacter                               |
| 0   | 7   | 1   | 0   | Alphaproteobacteria;Sphingomonadales;Sphingomonadaceae;Sphingomonas                |
| 36  | 0   | 3   | 0   | Betaproteobacteria                                                                 |
| 0   | 1   | 0   | 0   | Betaproteobacteria;Burkholderiales;Burkholderiaceae;Burkholderia                   |
| 0   | 0   | 0   | 2   | Betaproteobacteria;Burkholderiales;Burkholderiales_incertae_sedis;Aquabacterium    |

|     |     |     |    |                                                                               |
|-----|-----|-----|----|-------------------------------------------------------------------------------|
| 0   | 1   | 0   | 0  | Betaproteobacteria;Burkholderiales;Comamonadaceae;Pelomonas                   |
| 0   | 0   | 1   | 0  | Betaproteobacteria;Neisseriales;Neisseriaceae                                 |
| 0   | 1   | 0   | 0  | Betaproteobacteria;Nitrosomonadales;Nitrosomonadaceae                         |
| 0   | 1   | 1   | 0  | Betaproteobacteria;Rhodocyclales;Rhodocyclaceae                               |
| 8   | 59  | 16  | 21 | Deltaproteobacteria                                                           |
| 4   | 0   | 0   | 0  | Deltaproteobacteria;Bdellovibrionales;Bacteriovoracaceae;Bacteriovorax        |
| 24  | 6   | 0   | 16 | Deltaproteobacteria;Desulfobacterales;Desulfobacteraceae                      |
| 0   | 1   | 0   | 0  | Deltaproteobacteria;Desulfobacterales;Desulfobacteraceae;Desulfatiferula      |
| 5   | 31  | 0   | 0  | Deltaproteobacteria;Desulfobacterales;Desulfobulbaceae                        |
| 0   | 0   | 2   | 0  | Deltaproteobacteria;Desulfuromonadales                                        |
| 0   | 0   | 1   | 0  | Deltaproteobacteria;Desulfuromonadales;Geobacteraceae                         |
| 2   | 1   | 2   | 1  | Deltaproteobacteria;Myxococcales                                              |
| 0   | 2   | 0   | 0  | Deltaproteobacteria;Myxococcales;Haliangiaceae;Haliangium                     |
| 1   | 1   | 1   | 0  | Deltaproteobacteria;Myxococcales;Nannocystaceae                               |
| 0   | 0   | 6   | 0  | Epsilonproteobacteria;Campylobacterales                                       |
| 32  | 1   | 0   | 0  | Epsilonproteobacteria;Campylobacterales;Campylobacteraceae                    |
| 4   | 0   | 0   | 0  | Epsilonproteobacteria;Campylobacterales;Campylobacteraceae;Sulfurospirillum   |
| 17  | 1   | 3   | 0  | Epsilonproteobacteria;Campylobacterales;Helicobacteraceae                     |
| 98  | 1   | 5   | 0  | Epsilonproteobacteria;Campylobacterales;Helicobacteraceae;Sulfurimonas        |
| 1   | 0   | 0   | 0  | Epsilonproteobacteria;Campylobacterales;Helicobacteraceae;Wolinella           |
| 626 | 369 | 332 | 35 | Gammaproteobacteria                                                           |
| 2   | 1   | 0   | 0  | Gammaproteobacteria;Alteromonadales                                           |
| 3   | 3   | 0   | 1  | Gammaproteobacteria;Chromatiales                                              |
| 23  | 0   | 7   | 0  | Gammaproteobacteria;Chromatiales;Ectothiorhodospiraceae                       |
| 0   | 3   | 0   | 2  | Gammaproteobacteria;Enterobacteriales;Enterobacteriaceae                      |
| 0   | 2   | 1   | 0  | Gammaproteobacteria;Enterobacteriales;Enterobacteriaceae;Escherichia/Shigella |
| 0   | 5   | 0   | 0  | Gammaproteobacteria;Gammaproteobacteria_incertae_sedis                        |
| 1   | 2   | 0   | 1  | Gammaproteobacteria;Gammaproteobacteria_incertae_sedis;Sedimenticola          |
| 1   | 0   | 0   | 0  | Gammaproteobacteria;Legionellales;Legionellaceae                              |
| 0   | 0   | 10  | 0  | Gammaproteobacteria;Methylococcales;Methylococcaceae                          |
| 32  | 0   | 5   | 0  | Gammaproteobacteria;Methylococcales;Methylococcaceae;Methylomonas             |
| 0   | 0   | 4   | 3  | Gammaproteobacteria;Pasteurellales;Pasteurellaceae                            |
| 0   | 1   | 0   | 0  | Gammaproteobacteria;Pseudomonadales;Moraxellaceae                             |
| 0   | 1   | 9   | 0  | Gammaproteobacteria;Pseudomonadales;Moraxellaceae;Acinetobacter               |
| 0   | 0   | 1   | 0  | Gammaproteobacteria;Pseudomonadales;Moraxellaceae;Psychrobacter               |
| 2   | 19  | 186 | 22 | Gammaproteobacteria;Pseudomonadales;Pseudomonadaceae;Pseudomonas              |
| 8   | 0   | 0   | 0  | Gammaproteobacteria;Thiotrichales;Piscirickettsiaceae;Thiomicrospira          |
| 0   | 1   | 0   | 1  | Gammaproteobacteria;Xanthomonadales;Xanthomonadaceae;Stenotrophomonas         |
| 16  | 0   | 0   | 2  | Spirochaetes;Spirochaetes;Spirochaetales;Spirochaetaceae;Spirochaeta          |
| 1   | 3   | 2   | 3  | TM7;TM7_genera_incertae_sedis                                                 |
| 3   | 1   | 0   | 0  | Verrucomicrobia                                                               |
| 5   | 1   | 0   | 2  | Verrucomicrobia;Opitutae                                                      |
| 1   | 0   | 0   | 0  | Verrucomicrobia;Opitutae;Opitutales;Opitutaceae                               |
| 1   | 0   | 0   | 0  | Verrucomicrobia;Opitutae;Puniceococcales;Puniceococcaceae                     |
| 5   | 11  | 2   | 0  | Verrucomicrobia;Verrucomicrobiae;Verrucomicrobiales;Verrucomicrobiaceae       |
| 0   | 1   | 0   | 0  | WS3;WS3_genera_incertae_sedis                                                 |
| 33  | 14  | 4   | 24 | Unclassified                                                                  |

### Supplementary Table S4

Bray-Curtis similarities of microbial community composition among the four investigated samples at an OTU (observed species) level and phylum level.

|                     | NA014_003 | NA014_007 | NA014_016 |
|---------------------|-----------|-----------|-----------|
| <i>OTU level</i>    |           |           |           |
| NA014_007           | 0         |           |           |
| NA014_016           | 25.53     | 0         |           |
| NA014_042           | 0         | 7.15      | 0         |
| <i>Phylum level</i> |           |           |           |
| NA014_007           | 66.25     |           |           |
| NA014_016           | 82.06     | 60.03     |           |
| NA014_042           | 52.47     | 72.12     | 50.44     |

### Supplementary References

1. Rudnick, R. & Gao, S. Composition of the continental crust. In “The Crust”, Holland, H.D. & Turekian, K.K. eds. *Treatise on Geochemistry*. Elsevier Pergamon, Oxford **3**, 1-64 (2003).
2. Iizasa, K. *et al.* A Kuroko-Type polymetallic sulfide deposit in a submarine silicic caldera. *Science* **283**, 975-977 (1999).
3. Glasby, G. P., Iizasa, K., Hannington, M., Kubota, H. , Notsu, K. Mineralogy and composition of Kuroko deposits from northeastern Honshu and their possible modern analogues from the Izu-Ogasawara (Bonin) Arc south of Japan: Implications for mode of formation. *Ore Geology Reviews* **34**, 247-560 (2008).
4. Halbach, P., *et al.* Probable modern analogue of Kuroko-type massive sulfide deposits in the Okinawa Trough back-arc basin. *Nature* **338**, 496-499 (1989).

5. Dekov, V.M., Savelli, C. Hydrothermal activity in the SE Tyrrhenian Sea: an overview of 30 years of research. *Mar. Geol.* **204**, 161–185 (2004).
6. Tufar, W. Paragenesis of complex massive sulfide ores from the Tyrrhenian Sea. *Mitteilungen der Österreichischen Geologischen Gesellschaft* **84**, 265–300 (1991).
7. de Ronde, C.E.J. *et al.* Discovery of active hydrothermal venting in Lake Taupo, New Zealand. *Journal of Volcanology and Geothermal Research* **115**, 257-275 (2002).
